# Supplementary material
Source: PubMed Central journal article supplement (PMC5736004)
Supplement: NIHMS924330-supplement-Supp_FigS1.pdf [file NIHMS924330-supplement-Supp_FigS1.pdf]

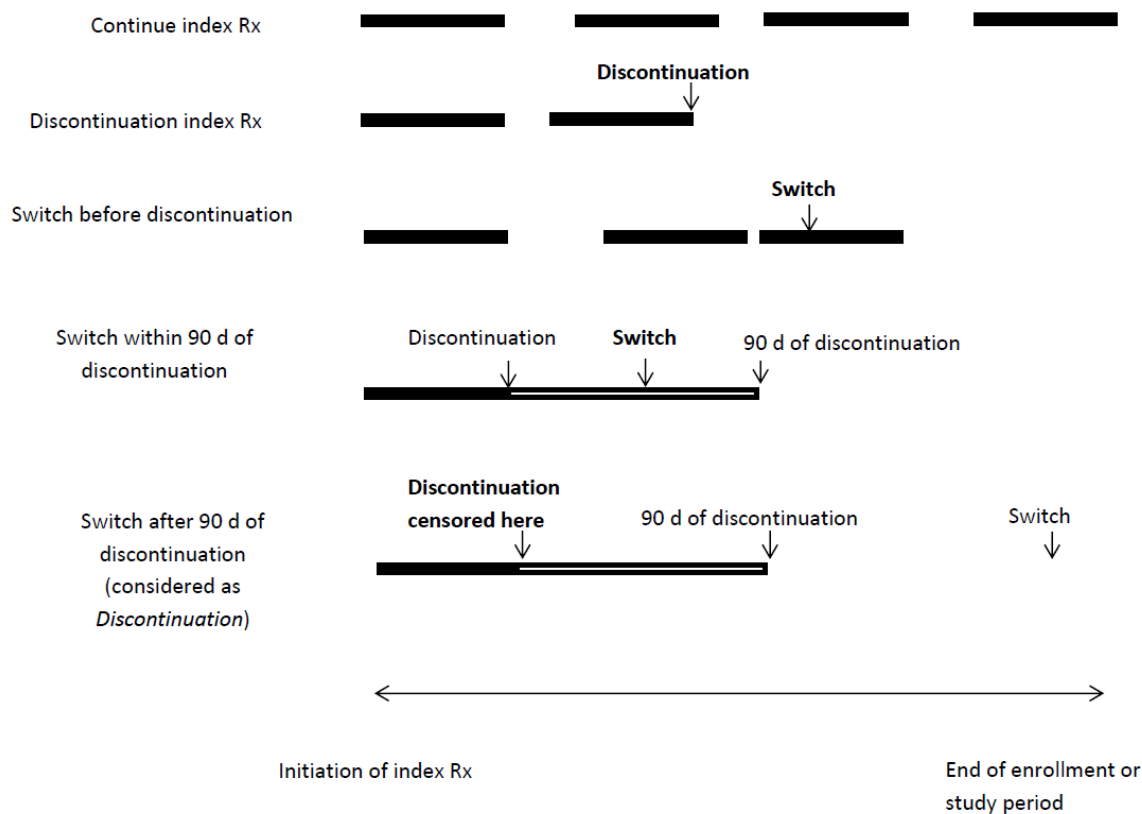

**Figure S1.** Definition of Continuation, Discontinuation, and Switching of the Medical Therapy. Rx indicates medication.
