# Supplementary material
Source: PubMed Central journal article supplement (PMC5736004)
Supplement: NIHMS924330-supplement-Supp_FigS3.pdf [file NIHMS924330-supplement-Supp_FigS3.pdf]

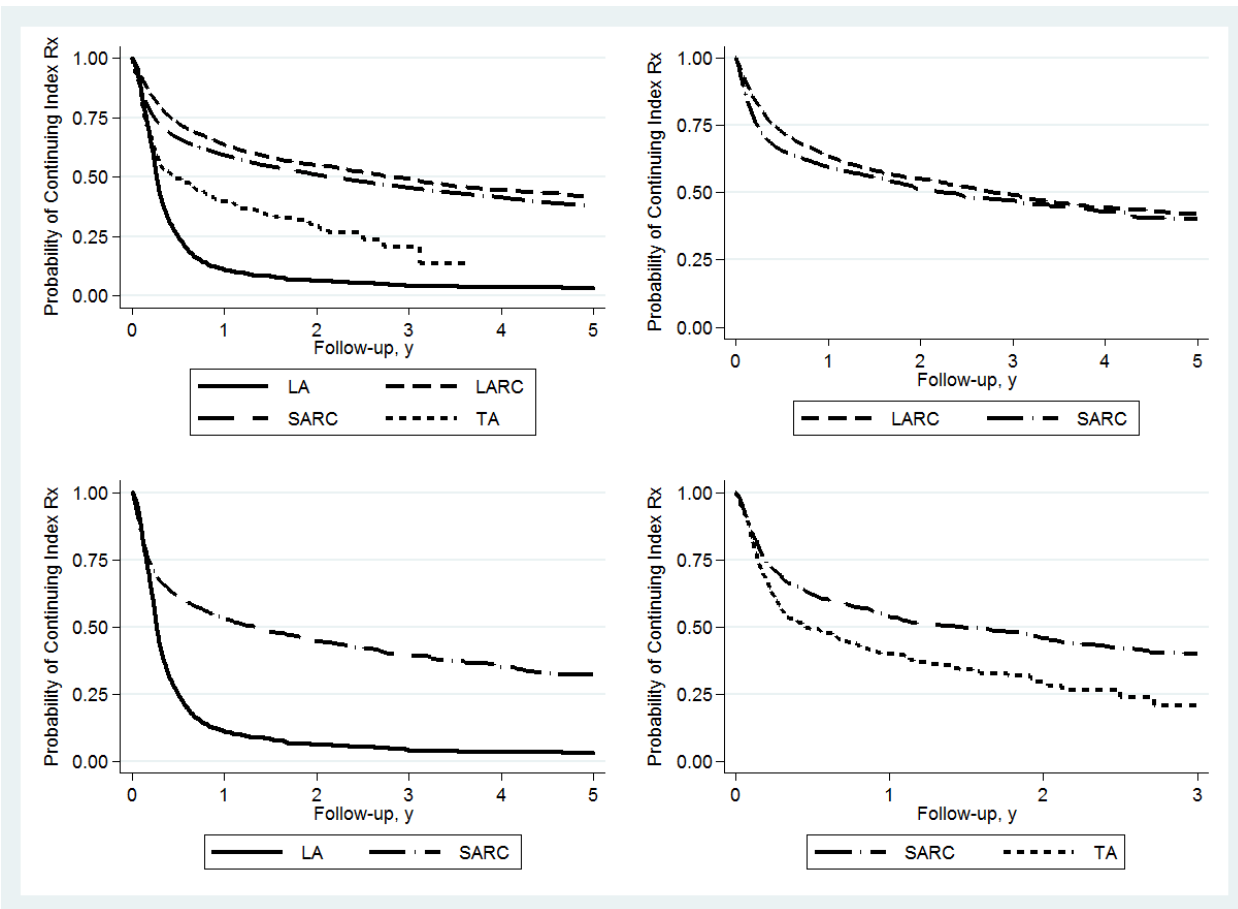

**Figure S3.** Kaplan-Meier Survival Curve Showing Time to Medication Switching. A, The 4 medications before propensity score matching. B, Long-acting reversible contraceptive steroid (LARC) vs short-acting reversible contraceptive steroid (SARC). C, Leuprolide acetate (LA) vs SARC. D, Tranexamic acid (TA) vs SARC.
