# Supplementary material
Source: PubMed Central journal article supplement (PMC5736004)
Supplement: NIHMS924330-supplement-Supp_FigS4.pdf [file NIHMS924330-supplement-Supp_FigS4.pdf]

**Table S1.** Patient Characteristics Stratified by Index Medication

| Characteristic    | Index Medication <sup>a</sup> |              |               |             |               | P Value |
|-------------------|-------------------------------|--------------|---------------|-------------|---------------|---------|
|                   | LARC                          | LA           | SARC          | TA          | Total         |         |
| Participants      | 3,928 (9.5)                   | 3,525 (8.5)  | 33,000 (79.4) | 1,108 (2.7) | 41,561 (100)  |         |
| Age, mean (SD), y | 42.2 (6.5)                    | 43.0 (6.2)   | 42.7 (6.8)    | 44.0 (5.8)  | 42.7 (6.7)    | <.001   |
| Race/ethnicity    |                               |              |               |             |               | <.001   |
| Asian             | 157 (4.0)                     | 138 (3.9)    | 1,343 (4.1)   | 45 (4.1)    | 1,683 (4.0)   |         |
| Black             | 670 (17.1)                    | 653 (18.5)   | 4,221 (12.8)  | 270 (24.4)  | 5,814 (14.0)  |         |
| Hispanic          | 377 (9.6)                     | 277 (7.9)    | 3,469 (10.5)  | 120 (10.8)  | 4,243 (10.2)  |         |
| Unknown           | 363 (9.2)                     | 474 (13.4)   | 3,467 (10.5)  | 50 (4.5)    | 4,354 (10.5)  |         |
| White             | 2,361 (60.1)                  | 1,983 (56.3) | 20,500 (62.1) | 623 (56.2)  | 25,467 (61.3) |         |
| Income level      |                               |              |               |             |               | <.001   |
| <\$40,000         | 639 (16.3)                    | 526 (14.9)   | 4,506 (13.7)  | 166 (15.0)  | 5,837 (14.0)  |         |
| \$40,000–\$49,999 | 479 (12.2)                    | 424 (12.0)   | 3,751 (11.4)  | 110 (9.9)   | 4,764 (11.5)  |         |
| \$50,000–\$59,999 | 473 (12.0)                    | 420 (11.9)   | 3,591 (10.9)  | 119 (10.7)  | 4,603 (11.1)  |         |
| \$60,000–\$74,999 | 523 (13.3)                    | 480 (13.6)   | 4,564 (13.8)  | 148 (13.4)  | 5,715 (13.8)  |         |
| \$75,000–\$99,999 | 693 (17.6)                    | 593 (16.8)   | 5,956 (18.0)  | 227 (20.5)  | 7,469 (18.0)  |         |
| ≥\$100,000        | 802 (20.4)                    | 629 (17.8)   | 7,491 (22.7)  | 301 (27.2)  | 9,223 (22.2)  |         |
| Unknown           | 319 (8.1)                     | 453 (12.9)   | 3,141 (9.5)   | 37 (3.3)    | 3,950 (9.5)   |         |

|                                    |              |              |               |            |               |       |
|------------------------------------|--------------|--------------|---------------|------------|---------------|-------|
| Region                             |              |              |               |            |               | <.001 |
| Midwest                            | 984 (25.1)   | 914 (25.9)   | 7,739 (23.5)  | 150 (13.5) | 9,787 (23.5)  |       |
| Northeast                          | 702 (17.9)   | 879 (24.9)   | 6,290 (19.1)  | 222 (20.0) | 8,093 (19.5)  |       |
| South                              | 1,669 (42.5) | 1,351 (38.3) | 14,139 (42.8) | 620 (56.0) | 17,779 (42.8) |       |
| West                               | 561 (14.3)   | 368 (10.4)   | 4,749 (14.4)  | 115 (10.4) | 5,793 (13.9)  |       |
| Unknown                            | 12 (0.3)     | 13 (0.4)     | 83 (0.3)      | 1 (0.1)    | 109 (0.3)     |       |
| Charlson-Deyo                      |              |              |               |            |               | .006  |
| comorbidity index at               |              |              |               |            |               |       |
| baseline                           |              |              |               |            |               |       |
| 0                                  | 2,592 (66.0) | 2,343 (66.5) | 21,736 (65.9) | 685 (61.8) | 27,356 (65.8) |       |
| 1                                  | 955 (24.3)   | 846 (24.0)   | 8,390 (25.4)  | 311 (28.1) | 10,502 (25.3) |       |
| ≥2                                 | 381 (9.7)    | 336 (9.5)    | 2,874 (8.7)   | 112 (10.1) | 3,703 (8.9)   |       |
| Baseline comorbidities             |              |              |               |            |               |       |
| Pelvic pain                        | 1,271 (32.4) | 1,191 (33.8) | 10,122 (30.7) | 320 (28.9) | 12,904 (31.0) | <.001 |
| Dyspareunia                        | 67 (1.7)     | 78 (2.2)     | 652 (2.0)     | 14 (1.3)   | 811 (2.0)     | .15   |
| Endometriosis                      | 178 (4.5)    | 312 (8.9)    | 1,413 (4.3)   | 35 (3.2)   | 1,938 (4.7)   | <.001 |
| Benign neoplasm of<br>uterus/ovary | 333 (8.5)    | 192 (5.4)    | 3,075 (9.3)   | 44 (4.0)   | 3,644 (8.8)   | <.001 |

|                                              |              |              |              |            |               |       |
|----------------------------------------------|--------------|--------------|--------------|------------|---------------|-------|
| Uterine disorder not<br>classified elsewhere | 865 (22.0)   | 906 (25.7)   | 7,380 (22.4) | 219 (19.8) | 9,370 (22.5)  | <.001 |
| Genital prolapse                             | 43 (1.1)     | 49 (1.4)     | 443 (1.3)    | 13 (1.2)   | 548 (1.3)     | .58   |
| Pregnancy                                    | 264 (6.7)    | 131 (3.7)    | 1,588 (4.8)  | 36 (3.2)   | 2,019 (4.9)   | <.001 |
| Spontaneous abortion                         | 36 (0.9)     | 16 (0.5)     | 184 (0.6)    | 2 (0.2)    | 238 (0.6)     | .007  |
| Therapeutic abortion                         | 22 (0.6)     | 6 (0.2)      | 96 (0.3)     | 0 (0.0)    | 124 (0.3)     | .002  |
| Ectopic pregnancy                            | 13 (0.3)     | 9 (0.3)      | 74 (0.2)     | 1 (0.1)    | 97 (0.2)      | .43   |
| Cesarean section                             | 89 (2.3)     | 51 (1.4)     | 444 (1.3)    | 11 (1.0)   | 595 (1.4)     | <.001 |
| Other pelvic<br>malignancy                   | 3 (0.1)      | 5 (0.1)      | 49 (0.1)     | 2 (0.2)    | 59 (0.1)      | .71   |
| Anemias                                      | 1,238 (31.5) | 1,690 (47.9) | 8,686 (26.3) | 460 (41.5) | 12,074 (29.1) | <.001 |
| Inflammatory disease                         | 111 (2.8)    | 187 (5.3)    | 1,006 (3.0)  | 17 (1.5)   | 1,321 (3.2)   | <.001 |
| Noninflammatory<br>disease                   | 1,090 (27.7) | 920 (26.1)   | 9,898 (30.0) | 287 (25.9) | 12,195 (29.3) | <.001 |
| Sepsis                                       | 7 (0.2)      | 13 (0.4)     | 45 (0.1)     | 2 (0.2)    | 67 (0.2)      | .01   |
| Constipation or gas                          | 179 (4.6)    | 149 (4.2)    | 1,380 (4.2)  | 46 (4.2)   | 1,754 (4.2)   | .74   |
| Intestinal obstruction                       | 6 (0.2)      | 11 (0.3)     | 55 (0.2)     | 2 (0.2)    | 74 (0.2)      | .27   |
| Peritonitis                                  | 4 (0.1)      | 7 (0.2)      | 50 (0.2)     | 2 (0.2)    | 63 (0.2)      | .75   |
| Urinary problem                              | 356 (9.1)    | 287 (8.1)    | 2,750 (8.3)  | 99 (8.9)   | 3,492 (8.4)   | .37   |

|                                             |             |             |             |             |             |       |
|---------------------------------------------|-------------|-------------|-------------|-------------|-------------|-------|
| Nocturia                                    | 11 (0.3)    | 13 (0.4)    | 86 (0.3)    | 3 (0.3)     | 113 (0.3)   | .71   |
| Baseline health care utilization, mean (SD) |             |             |             |             |             |       |
| UF-related outpatient visit                 | 1.4 (1.2)   | 2.2 (1.7)   | 1.4 (1.2)   | 1.5 (1.4)   | 1.5 (1.3)   | <.001 |
| UF-related ED and inpatient visits          | 0.1 (0.3)   | 0.1 (0.4)   | 0.1 (0.3)   | 0.1 (0.3)   | 0.1 (0.3)   | <.001 |
| Any outpatient visit                        | 14.0 (12.4) | 12.3 (11.1) | 12.7 (11.5) | 11.8 (11.3) | 12.8 (11.6) | <.001 |
| Any ED and inpatient visits                 | 0.5 (1.3)   | 0.5 (1.3)   | 0.4 (1.1)   | 0.5 (1.1)   | 0.4 (1.1)   | <.001 |

---

Abbreviations: ED, emergency department; LA, leuprolide acetate; LARC, long-acting reversible contraceptive steroid; SARC, short-acting reversible contraceptive steroid; TA, tranexamic acid; UF, uterine fibroid.

<sup>a</sup> Values are presented as number and percentage of women unless stated otherwise.
