# Supplementary material
Source: PubMed Central journal article supplement (PMC5736004)
Supplement: NIHMS924330-supplement-Supp_FigS5.pdf [file NIHMS924330-supplement-Supp_FigS5.pdf]

**Table S2.** Multinomial Logistic Regression- Patient Characteristics Associated with Index Medication for the 41,561 Study Women

| Predictor         | Index Medication <sup>a</sup> |                               |                               |
|-------------------|-------------------------------|-------------------------------|-------------------------------|
|                   | LARC                          | LA                            | TA                            |
| Age, y            |                               |                               |                               |
| 18-40             | Ref                           | Ref                           | Ref                           |
| 41-46             | 1.10 <sup>b</sup> (1.02-1.19) | 1.16 <sup>c</sup> (1.06-1.27) | 1.58 <sup>d</sup> (1.35-1.85) |
| >46               | 0.83 <sup>d</sup> (0.76-0.91) | 1.06 (0.97-1.16)              | 1.50 <sup>d</sup> (1.28-1.77) |
| Race/ethnicity    |                               |                               |                               |
| Asian             | 1.02 (0.86-1.21)              | 0.80 <sup>b</sup> (0.66-0.96) | 0.99 (0.72-1.36)              |
| Black             | 1.30 <sup>d</sup> (1.17-1.43) | 1.20 <sup>d</sup> (1.08-1.34) | 1.95 <sup>d</sup> (1.65-2.29) |
| Hispanic          | 0.91 (0.81-1.02)              | 0.71 <sup>d</sup> (0.62-0.82) | 1.12 (0.91-1.38)              |
| Unknown           | 1.00 (0.86-1.17)              | 1.07 (0.92-1.26)              | 0.74 (0.52-1.05)              |
| White             | Ref                           | Ref                           | Ref                           |
| Household income  |                               |                               |                               |
| <\$40,000         | Ref                           | Ref                           | Ref                           |
| \$40,000-\$49,999 | 0.93 (0.82-1.06)              | 1.05 (0.92-1.21)              | 0.94 (0.73-1.20)              |
| \$50,000-\$59,999 | 0.97 (0.86-1.11)              | 1.11 (0.96-1.28)              | 1.10 (0.86-1.41)              |
| \$60,000-\$74,999 | 0.86 <sup>b</sup> (0.75-0.97) | 1.02 (0.89-1.17)              | 1.17 (0.93-1.48)              |
| \$75,000-\$99,999 | 0.88 <sup>b</sup> (0.78-0.99) | 0.98 (0.86-1.12)              | 1.43 <sup>c</sup> (1.15-1.77) |
| ≥\$100,000        | 0.83 <sup>c</sup> (0.73-0.93) | 0.84 <sup>b</sup> (0.73-0.96) | 1.57 <sup>d</sup> (1.27-1.95) |
| Unknown           | 0.79 <sup>b</sup> (0.65-0.94) | 1.19 (0.99-1.43)              | 0.55 <sup>c</sup> (0.36-0.84) |
| US Region         |                               |                               |                               |
| Midwest           | Ref                           | Ref                           | Ref                           |
| Northeast         | 0.88 <sup>b</sup> (0.79-0.97) | 1.00 (0.90-1.12)              | 1.68 <sup>d</sup> (1.35-2.09) |
| South             | 0.87 <sup>c</sup> (0.80-0.95) | 0.71 <sup>d</sup> (0.64-0.77) | 2.01 <sup>d</sup> (1.67-2.42) |

|                                  |                               |                               |                               |
|----------------------------------|-------------------------------|-------------------------------|-------------------------------|
| Unknown                          | 1.18 (0.64-2.17)              | 1.29 (0.70-2.39)              | 0.55 (0.08-4.01)              |
| West                             | 0.97 (0.86-1.08)              | 0.72 <sup>d</sup> (0.63-0.82) | 1.16 (0.90-1.49)              |
| Baseline health care utilization |                               |                               |                               |
| UF-related inpatient admission   | 0.87 (0.69-1.09)              | 1.38 <sup>c</sup> (1.11-1.71) | 0.53 <sup>b</sup> (0.31-0.88) |
| UF-related outpatient service    | 0.97 (0.94-1.00)              | 1.43 <sup>d</sup> (1.40-1.47) | 1.03 (0.98-1.08)              |
| UF-related ED visit              | 0.92 (0.76-1.12)              | 1.11 (0.93-1.33)              | 1.41 <sup>b</sup> (1.07-1.86) |
| Any inpatient admission          | 1.11 (1.00-1.23)              | 1.20 <sup>c</sup> (1.06-1.36) | 0.96 (0.76-1.22)              |
| Any outpatient service           | 1.01 <sup>d</sup> (1.01-1.01) | 0.99 <sup>d</sup> (0.98-0.99) | 0.99 <sup>c</sup> (0.99-1.00) |
| Any ED visit                     | 1.01 (0.97-1.04)              | 0.97 (0.92-1.02)              | 1.03 (0.97-1.09)              |
| Comorbidities                    |                               |                               |                               |
| Anemia                           | 1.26 <sup>d</sup> (1.17-1.35) | 2.27 <sup>d</sup> (2.10-2.44) | 1.84 <sup>d</sup> (1.62-2.09) |
| Inflammatory disease             | 0.86 (0.70-1.06)              | 1.49 <sup>d</sup> (1.25-1.78) | 0.61 (0.37-1.00)              |
| Noninflammatory disease          | 0.88 <sup>c</sup> (0.82-0.95) | 0.71 <sup>d</sup> (0.66-0.78) | 0.88 (0.76-1.01)              |
| Endometriosis                    | 1.10 (0.93-1.30)              | 2.27 <sup>d</sup> (1.97-2.61) | 0.98 (0.69-1.39)              |
| Benign neoplasm of uterus/ovary  | 0.90 (0.80-1.02)              | 0.62 <sup>d</sup> (0.53-0.72) | 0.49 <sup>d</sup> (0.36-0.67) |
| Pregnancy/delivery               | 1.64 <sup>d</sup> (1.34-2.01) | 0.20 <sup>d</sup> (0.12-0.32) | 1.11 (0.66-1.88)              |

Abbreviations: ED, emergency department; LA, leuprolide acetate; LARC, long-acting reversible contraceptive steroid; Ref, short-acting reversible contraceptive steroid as reference; TA, tranexamic acid; UF, uterine fibroid.

<sup>a</sup> Values are presented as relative risk ratio (95% CI).

<sup>b</sup>  $P < .05$ .

<sup>c</sup>  $P < .01$ .

<sup>d</sup>  $P < .001$ .
