# Supplementary material
Source: PubMed Central journal article supplement (PMC5736004)
Supplement: NIHMS924330-supplement-Supp_FigS6.pdf [file NIHMS924330-supplement-Supp_FigS6.pdf]

**Table S3.** Multinomial Logistic Regression- Patient Characteristics Associated with Whether the 41,561 Women Switched From or Discontinued Their Index Medication Therapy

| Predictor         | Discontinued Medication          | Switched to Other                |
|-------------------|----------------------------------|----------------------------------|
|                   | Without Switch, RRR (95% CI)     | Therapies, RRR (95% CI)          |
| Index medication  |                                  |                                  |
| LARC              | 0.14 <sup>a</sup> (0.13-0.15)    | 0.36 <sup>a</sup> (0.33-0.39)    |
| LA                | 19.23 <sup>a</sup> (11.32-32.64) | 48.64 <sup>a</sup> (28.69-82.46) |
| SARC              | Ref                              | Ref                              |
| TA                | 4.64 <sup>a</sup> (3.39-6.34)    | 4.29 <sup>a</sup> (3.12-5.89)    |
| Age, y            |                                  |                                  |
| 18-40             | Ref                              | Ref                              |
| 41-46             | 1.11 <sup>b</sup> (1.03-1.20)    | 1.30 <sup>a</sup> (1.21-1.41)    |
| >46               | 1.76 <sup>a</sup> (1.62-1.91)    | 1.46 <sup>a</sup> (1.34-1.58)    |
| Race              |                                  |                                  |
| Asian             | 1.36 <sup>a</sup> (1.16-1.59)    | 0.80 <sup>b</sup> (0.67-0.94)    |
| Black             | 1.28 <sup>a</sup> (1.15-1.42)    | 1.04 (0.93-1.16)                 |
| Hispanic          | 1.39 <sup>a</sup> (1.24-1.55)    | 1.07 (0.96-1.20)                 |
| Unknown           | 1.15 <sup>c</sup> (1.00-1.33)    | 0.98 (0.85-1.14)                 |
| White             | Ref                              | Ref                              |
| Household income  |                                  |                                  |
| <\$40,000         | Ref                              | Ref                              |
| \$40,000-\$49,999 | 0.85 <sup>c</sup> (0.75-0.98)    | 0.97 (0.85-1.11)                 |
| \$50,000-\$59,999 | 0.82 <sup>b</sup> (0.72-0.94)    | 0.89 (0.78-1.02)                 |
| \$60,000-\$74,999 | 0.75 <sup>a</sup> (0.66-0.85)    | 0.86 <sup>c</sup> (0.76-0.98)    |
| \$75,000-\$99,999 | 0.68 <sup>a</sup> (0.60-0.77)    | 0.76 <sup>a</sup> (0.67-0.86)    |

|                                  |                               |                               |
|----------------------------------|-------------------------------|-------------------------------|
| ≥\$100,000                       | 0.63 <sup>a</sup> (0.56-0.71) | 0.68 <sup>a</sup> (0.61-0.77) |
| Unknown                          | 0.83 <sup>c</sup> (0.70-0.98) | 0.83 <sup>c</sup> (0.70-0.99) |
| US region                        |                               |                               |
| Midwest                          | Ref                           | Ref                           |
| Northeast                        | 1.11 <sup>c</sup> (1.01-1.23) | 0.76 <sup>a</sup> (0.69-0.85) |
| South                            | 1.09 <sup>c</sup> (1.00-1.18) | 1.00 (0.92-1.08)              |
| Unknown                          | 1.78 (0.90-3.49)              | 1.04 (0.51-2.10)              |
| West                             | 0.94 (0.85-1.05)              | 1.03 (0.93-1.15)              |
| Baseline health care utilization |                               |                               |
| UF-related inpatient admission   | 1.22 (0.94-1.58)              | 1.43 <sup>b</sup> (1.11-1.86) |
| UF-related outpatient service    | 0.99 (0.96-1.02)              | 1.11 <sup>a</sup> (1.08-1.14) |
| UF-related ED visit              | 1.10 (0.89-1.36)              | 1.50 <sup>a</sup> (1.22-1.86) |
| Any inpatient admission          | 0.86 <sup>c</sup> (0.77-0.97) | 0.87 <sup>c</sup> (0.78-0.98) |
| Any outpatient service           | 1.00 (1.00-1.00)              | 1.00 (1.00-1.00)              |
| Any ED visit                     | 1.14 <sup>a</sup> (1.09-1.19) | 1.15 <sup>a</sup> (1.10-1.20) |
| Comorbidity                      |                               |                               |
| Anemia                           | 1.24 <sup>a</sup> (1.15-1.34) | 1.79 <sup>a</sup> (1.65-1.93) |
| Inflammatory disease             | 1.43 <sup>a</sup> (1.17-1.74) | 1.29 <sup>c</sup> (1.05-1.58) |
| Noninflammatory disease          | 1.09 <sup>c</sup> (1.02-1.17) | 0.86 <sup>a</sup> (0.80-0.92) |
| Endometriosis                    | 1.01 (0.87-1.18)              | 0.89 (0.76-1.04)              |
| Benign neoplasm of uterus/ovary  | 1.00 (0.90-1.11)              | 0.67 <sup>a</sup> (0.60-0.75) |
| Pregnancy/delivery               | 1.17 (0.94-1.44)              | 0.52 <sup>a</sup> (0.41-0.66) |
| Enrollment time, y               | 1.37 <sup>a</sup> (1.35-1.40) | 1.39 <sup>a</sup> (1.37-1.42) |

---

Abbreviations: ED, emergency department; LA, leuprolide acetate; LARC, long-acting reversible contraceptive steroid; Ref, reference; RRR, relative risk ratio; SARC, short-acting reversible contraceptive steroid; TA, tranexamic acid; UF, uterine fibroid.

<sup>a</sup>  $P < .001$ .

<sup>b</sup>  $P < .01$ .

<sup>c</sup>  $P < .05$ .
