# Supplementary material
Source: PubMed Central journal article supplement (PMC5736004)
Supplement: NIHMS924330-supplement-Supp_FigS7.pdf [file NIHMS924330-supplement-Supp_FigS7.pdf]

**Table S4.** Percentage of Women Who Continued Index Medication Therapy, Discontinued Index Medication Therapy, and Switched to Other Therapies at the Various Time Points

| Time Point   | Medication Cohort, % |                 |                    |                 |                     |
|--------------|----------------------|-----------------|--------------------|-----------------|---------------------|
|              | LARC<br>(n=3,928)    | LA<br>(n=3,525) | SARC<br>(n=33,000) | TA<br>(n=1,108) | Total<br>(N=41,561) |
| 3 mo         |                      |                 |                    |                 |                     |
| Continued    | 73.9                 | 42.9            | 54.3               | 34.5            | 54.7                |
| Discontinued | 8.7                  | 17.0            | 23.7               | 37.4            | 22.1                |
| Switched     | 17.4                 | 40.1            | 22.0               | 28.2            | 23.3                |
| 6 mo         |                      |                 |                    |                 |                     |
| Continued    | 61.8                 | 13.0            | 42.6               | 22.3            | 41.4                |
| Discontinued | 12.0                 | 26.0            | 29.7               | 43.1            | 28.1                |
| Switched     | 26.3                 | 61.0            | 27.7               | 34.6            | 30.6                |
| 1 y          |                      |                 |                    |                 |                     |
| Continued    | (n=3,177)            | (n=2,914)       | (n=27,021)         | (n=811)         | (n=33,923)          |
| Continued    | 52.0                 | 3.5             | 33.1               | 14.2            | 31.9                |
| Discontinued | 14.9                 | 29.5            | 34.9               | 47.8            | 32.9                |
| Switched     | 33.1                 | 67.0            | 32.0               | 38.0            | 35.2                |
| 2 y          |                      |                 |                    |                 |                     |
| Continued    | (n=2,103)            | (n=2,056)       | (n=18,496)         | (n=366)         | (n=23,021)          |
| Continued    | 42.4                 | 1.6             | 23.6               | 6.0             | 23.1                |
| Discontinued | 17.5                 | 29.6            | 40.3               | 55.2            | 37.5                |
| Switched     | 40.1                 | 68.8            | 36.1               | 38.8            | 39.5                |
| 5 y          |                      |                 |                    |                 |                     |
| Continued    | (n=602)              | (n=765)         | (n=6,215)          | (n=0)           | (n=7,582)           |
| Continued    | 15.9                 | 0.7             | 10.9               | N/A             | 10.3                |
| Discontinued | 34.2                 | 27.7            | 48.6               | N/A             | 45.4                |
| Switched     | 49.8                 | 71.6            | 40.5               | N/A             | 44.4                |

Abbreviations: LA, leuprolide acetate; LARC, long-acting reversible contraceptive steroid; N/A, not available; SARC, short-acting reversible contraceptive steroid; TA, tranexamic acid.
