# Supplementary material
Source: PubMed Central journal article supplement (PMC5736004)
Supplement: NIHMS924330-supplement-Supp_FigS8.pdf [file NIHMS924330-supplement-Supp_FigS8.pdf]

**Table S5.** Survival Analysis Results After Propensity Score Matching With Switch as the Outcome

| <b>Comparison</b> | <b>No. of Pairs After</b> |                    | <b>P Value</b> |
|-------------------|---------------------------|--------------------|----------------|
|                   | <b>Matching</b>           | <b>HR (95% CI)</b> |                |
| LARC vs SARC      | 3,922                     | 0.84 (0.79-0.91)   | <.001          |
| LA vs SARC        | 3,456                     | 2.44 (2.27-2.62)   | <.001          |
| TA vs SARC        | 1,106                     | 1.44 (1.26-1.65)   | <.001          |

Abbreviations: HR, hazard ratio; LA, leuprolide acetate; LARC, long-acting reversible contraceptive steroid; SARC, short-acting reversible contraceptive steroid; TA, tranexamic acid.
