# Supplementary material
Source: PubMed Central journal article supplement (PMC5736004)
Supplement: NIHMS924330-supplement-Supp_FigS9.pdf [file NIHMS924330-supplement-Supp_FigS9.pdf]

**Table S6.** International Classification of Disease, 9th edition, Clinical Modification (ICD-9-CM) Diagnosis Codes Used to Define Uterine Fibroid and Comorbidities

|                                 | <b>ICD-9-CM</b>                                                | <b>Description</b>                                                                   |
|---------------------------------|----------------------------------------------------------------|--------------------------------------------------------------------------------------|
| <b>Uterine fibroids</b>         | 218.xx                                                         | Uterine leiomyoma                                                                    |
|                                 | 218.0                                                          | Submucous leiomyoma of uterus                                                        |
|                                 | 218.1                                                          | Intramural leiomyoma of uterus                                                       |
|                                 | 218.2                                                          | Subserous leiomyoma of uterus                                                        |
|                                 | 218.9                                                          | Leiomyoma of uterus, unspecified                                                     |
|                                 | 219.xx                                                         | Other benign neoplasm of uterus                                                      |
|                                 | 219.0                                                          | Benign neoplasm of cervix uteri                                                      |
|                                 | 219.1                                                          | Benign neoplasm of corpus uteri                                                      |
|                                 | 219.8                                                          | Benign neoplasm of other specified parts of uterus                                   |
|                                 | 219.9                                                          | Benign neoplasm of uterus, part unspecified                                          |
|                                 | 654.1x                                                         | Tumors of body of uterus                                                             |
|                                 |                                                                | Tumors of body of uterus, unspecified as to episode of care or not applicable        |
|                                 | 654.10                                                         | Tumors of body of uterus, delivered, with or without mention of antepartum condition |
|                                 | 654.11                                                         | Tumors of body of uterus, delivered, with mention of postpartum complication         |
| 654.12                          | Tumors of body of uterus, antepartum condition or complication |                                                                                      |
| 654.13                          | Tumors of body of uterus, postpartum condition or complication |                                                                                      |
| 654.14                          | Tumors of body of uterus, postpartum condition or complication |                                                                                      |
| <b>Heavy menstrual bleeding</b> | 626.2                                                          | Excessive or frequent menstruation                                                   |
|                                 | 627.0                                                          | Premenopausal menorrhagia                                                            |
| <b>Pelvic pain</b>              | 625.0                                                          | Dyspareunia                                                                          |
|                                 | 625.3                                                          | Dysmenorrhea                                                                         |
|                                 | 789.03                                                         | Abdominal pain, right lower quadrant                                                 |
|                                 | 789.63                                                         | Abdominal tenderness, right lower quadrant                                           |
|                                 | 789.64                                                         | Abdominal tenderness, left lower quadrant                                            |
|                                 | 789.9                                                          | Other symptoms involving abdomen and pelvis                                          |
|                                 | 789.00                                                         | Abdominal pain, unspecified site                                                     |
|                                 | 789.04                                                         | Abdominal pain, left lower quadrant                                                  |
|                                 | 789.07                                                         | Abdominal pain, generalized                                                          |
|                                 | 789.09                                                         | Abdominal pain, other specified site                                                 |
| <b>Anemias</b>                  | 280.xx                                                         | Iron deficiency anemias                                                              |
|                                 |                                                                | Iron deficiency anemia secondary to blood loss (chronic)                             |
|                                 | 280.0                                                          | Iron deficiency anemia secondary to inadequate dietary iron intake                   |
|                                 | 280.1                                                          | Iron deficiency anemia secondary to inadequate dietary iron intake                   |
|                                 | 280.8                                                          | Other specified iron deficiency anemias                                              |

|                                 |                                                                                   |                                                                                       |
|---------------------------------|-----------------------------------------------------------------------------------|---------------------------------------------------------------------------------------|
|                                 | 280.9                                                                             | Iron deficiency anemia, unspecified                                                   |
|                                 | 285.1                                                                             | Acute posthemorrhagic anemia                                                          |
|                                 | 285.2                                                                             | Anemia of chronic disease                                                             |
|                                 | 285.29                                                                            | Anemia of other chronic disease                                                       |
|                                 | 285.8                                                                             | Other specified anemias                                                               |
|                                 | 285.9                                                                             | Anemia, unspecified                                                                   |
| <b>Inflammatory diseases</b>    |                                                                                   | Inflammatory disease of ovary, fallopian tube, pelvic cellular tissue, and peritoneum |
|                                 | 614.xx                                                                            |                                                                                       |
|                                 | 614.0                                                                             | Acute salpingitis and oophoritis                                                      |
|                                 | 614.1                                                                             | Chronic salpingitis and oophoritis                                                    |
|                                 |                                                                                   | Salpingitis and oophoritis not specified as acute, subacute, or chronic               |
|                                 | 614.2                                                                             |                                                                                       |
|                                 | 614.3                                                                             | Acute parametritis and pelvic cellulitis                                              |
|                                 |                                                                                   |                                                                                       |
|                                 | 614.4                                                                             | Chronic or unspecified parametritis and pelvic cellulitis                             |
|                                 | 614.5                                                                             | Acute or unspecified pelvic peritonitis, female                                       |
|                                 |                                                                                   | Pelvic peritoneal adhesions, female (postoperative) (postinfection)                   |
|                                 | 614.6                                                                             |                                                                                       |
|                                 | 614.7                                                                             | Other chronic pelvic peritonitis, female                                              |
|                                 |                                                                                   | Other specified inflammatory disease of female pelvic organs and tissues              |
|                                 | 614.8                                                                             |                                                                                       |
|                                 | Unspecified inflammatory disease of female pelvic organs and tissues              |                                                                                       |
| 614.9                           |                                                                                   |                                                                                       |
| 615                             | Inflammatory diseases of uterus, except cervix                                    |                                                                                       |
| 615.0                           | Acute inflammatory diseases of uterus, except cervix                              |                                                                                       |
| 615.1                           | Chronic inflammatory diseases of uterus, except cervix                            |                                                                                       |
| 615.9                           | Unspecified inflammatory disease of uterus                                        |                                                                                       |
| <b>Noninflammatory diseases</b> |                                                                                   | Noninflammatory disorders of ovary, fallopian tube, and broad ligament                |
|                                 | 620.xx                                                                            |                                                                                       |
|                                 | 620.0                                                                             | Follicular cyst of ovary                                                              |
|                                 | 620.1                                                                             | Corpus luteum cyst or hematoma                                                        |
|                                 | 620.2                                                                             | Other and unspecified ovarian cyst                                                    |
|                                 | 620.3                                                                             | Acquired atrophy of ovary and fallopian tube                                          |
|                                 | 620.4                                                                             | Prolapse or hernia of ovary and fallopian tube                                        |
|                                 | 620.5                                                                             | Torsion of ovary, ovarian pedicle, or fallopian tube                                  |
|                                 | 620.6                                                                             | Broad ligament laceration syndrome                                                    |
|                                 | 620.7                                                                             | Hematoma of broad ligament                                                            |
|                                 |                                                                                   | Other noninflammatory disorders of ovary, fallopian tube, and broad ligament          |
|                                 | 620.8                                                                             |                                                                                       |
|                                 | Unspecified noninflammatory disorder of ovary, fallopian tube, and broad ligament |                                                                                       |
| 620.9                           |                                                                                   |                                                                                       |

|                           |         |                                                                                   |
|---------------------------|---------|-----------------------------------------------------------------------------------|
|                           | 622.xx  | Noninflammatory disorders of cervix                                               |
|                           | 622.0   | Erosion and ectropion of cervix                                                   |
|                           | 622.1   | Dysplasia of cervix (uteri)                                                       |
|                           | 622.10  | Dysplasia of cervix, unspecified                                                  |
|                           | 622.11  | Mild dysplasia of cervix                                                          |
|                           | 622.12  | Moderate dysplasia of cervix                                                      |
|                           | 622.2   | Leukoplakia of cervix (uteri)                                                     |
|                           | 622.3   | Old laceration of cervix                                                          |
|                           | 622.4   | Stricture and stenosis of cervix                                                  |
|                           | 622.5   | Incompetence of cervix                                                            |
|                           | 622.6   | Hypertrophic elongation of cervix                                                 |
|                           | 622.7   | Mucous polyp of cervix                                                            |
|                           | 622.8   | Other specified noninflammatory disorders of cervix                               |
|                           | 622.9   | Unspecified noninflammatory disorder of cervix                                    |
|                           | 623.5   | Leukorrhea, not specified as infective                                            |
| <b>Endometriosis</b>      | 617.xx  | Endometriosis                                                                     |
|                           | 617.0   | Endometriosis of uterus                                                           |
|                           | 617.1   | Endometriosis of ovary                                                            |
|                           | 617.2   | Endometriosis of fallopian tube                                                   |
|                           | 617.3   | Endometriosis of pelvic peritoneum                                                |
|                           | 617.4   | Endometriosis of rectovaginal septum and vagina                                   |
|                           | 617.5   | Endometriosis of intestine                                                        |
|                           | 617.6   | Endometriosis in scar of skin                                                     |
|                           | 617.8   | Endometriosis of other specified sites                                            |
|                           | 617.9   | Endometriosis, site unspecified                                                   |
| <b>Pregnancy</b>          | V22.x   | Normal pregnancy                                                                  |
|                           | V23.x   | Supervision of high-risk pregnancy                                                |
|                           | V27.x   | Outcome of delivery                                                               |
|                           | 630–633 | Ectopic and molar pregnancy                                                       |
|                           | 634–639 | Other pregnancy with abortive outcome                                             |
|                           | 640-649 | Complications mainly related to pregnancy                                         |
|                           | 650-659 | Normal delivery, and other indications for care in pregnancy, labor, and delivery |
|                           | 660–669 | Complications occurring mainly in the course of labor and delivery                |
|                           | 670–677 | Complications of the puerperium                                                   |
| <b>Pregnancy/delivery</b> | V22.2   | Pregnant state, incidental                                                        |
|                           | 650     | Normal delivery                                                                   |
| <b>Urinary problems</b>   | 591.xx  | Hydronephrosis                                                                    |
|                           | 593.5x  | Hydroureter                                                                       |

|                                                         |        |                                               |
|---------------------------------------------------------|--------|-----------------------------------------------|
|                                                         | 788.1  | Dysuria                                       |
|                                                         | 788.2  | Retention of urine                            |
|                                                         | 788.20 | Retention of urine, unspecified               |
|                                                         | 788.21 | Incomplete bladder emptying                   |
|                                                         | 788.29 | Other specified retention of urine            |
|                                                         | 788.3  | Urinary incontinence                          |
|                                                         | 788.30 | Urinary incontinence, unspecified             |
|                                                         | 788.31 | Urge incontinence                             |
|                                                         | 788.33 | Mixed incontinence (male) (female)            |
|                                                         | 788.34 | Incontinence without sensory awareness        |
|                                                         | 788.35 | Post-void dribbling                           |
|                                                         | 788.36 | Nocturnal enuresis                            |
|                                                         | 788.37 | Continuous leakage                            |
|                                                         | 788.38 | Overflow incontinence                         |
|                                                         | 788.39 | Other urinary incontinence                    |
|                                                         | 788.4  | Frequency of urination and polyuria           |
|                                                         | 788.41 | Urinary frequency                             |
|                                                         | 788.42 | Polyuria                                      |
|                                                         | 788.43 | Nocturia                                      |
|                                                         | 788.5  | Oliguria and anuria                           |
|                                                         | 788.6  | Other abnormality of urination                |
|                                                         | 788.61 | Splitting of urinary stream                   |
|                                                         | 788.62 | Slowing of urinary stream                     |
|                                                         | 788.63 | Urgency of urination                          |
|                                                         | 788.64 | Urinary hesitancy                             |
|                                                         | 788.65 | Straining on urination                        |
|                                                         | 788.69 | Other abnormality of urination                |
|                                                         | 788.7  | Urethral discharge                            |
|                                                         | 788.8  | Extravasation of urine                        |
|                                                         | 788.9  | Other symptoms involving urinary system       |
|                                                         | 788.91 | Functional urinary incontinence               |
|                                                         | 788.99 | Other symptoms involving urinary system       |
| <b>Constipation or gas</b>                              | 564.00 | Constipation, unspecified                     |
|                                                         | 564.09 | Other constipation                            |
|                                                         | 787.3  | Flatulence, eructation, and gas pain          |
|                                                         | 564.0  | Constipation                                  |
|                                                         | 564.01 | Slow transit constipation                     |
|                                                         | 564.02 | Outlet dysfunction constipation               |
| <b>Disorders of the uterus not elsewhere classified</b> | 621.xx | Disorders of uterus, not elsewhere classified |
|                                                         | 621.0  | Polyp of corpus uteri                         |
|                                                         | 621.1  | Chronic subinvolution of uterus               |
|                                                         | 621.2  | Hypertrophy of uterus                         |

|                                            |        |                                                                     |
|--------------------------------------------|--------|---------------------------------------------------------------------|
|                                            | 621.3  | Endometrial hyperplasia                                             |
|                                            | 621.30 | Endometrial hyperplasia, unspecified                                |
|                                            | 621.31 | Simple endometrial hyperplasia without atypia                       |
|                                            | 621.32 | Complex endometrial hyperplasia without atypia                      |
|                                            | 621.33 | Endometrial hyperplasia with atypia                                 |
|                                            | 621.34 | Benign endometrial hyperplasia                                      |
|                                            | 621.35 | Endometrial intraepithelial neoplasia [EIN]                         |
|                                            | 621.4  | Hematometra                                                         |
|                                            | 621.5  | Intrauterine synechiae                                              |
|                                            | 621.6  | Malposition of uterus                                               |
|                                            | 621.7  | Chronic inversion of uterus                                         |
|                                            |        | Other specified disorders of uterus, not elsewhere classified       |
|                                            | 621.8  |                                                                     |
|                                            | 621.9  | Unspecified disorder of uterus                                      |
| <b>Genital prolapse</b>                    | 618.xx | Genital prolapse                                                    |
|                                            |        | Prolapse of vaginal walls without mention of uterine prolapse       |
|                                            | 618.0  |                                                                     |
|                                            | 618.00 | Unspecified prolapse of vaginal walls                               |
|                                            | 618.01 | Cystocele, midline                                                  |
|                                            | 618.02 | Cystocele, lateral                                                  |
|                                            | 618.03 | Urethrocele                                                         |
|                                            | 618.04 | Rectocele                                                           |
|                                            | 618.05 | Perineocele                                                         |
|                                            |        | Other prolapse of vaginal walls without mention of uterine prolapse |
|                                            | 618.09 |                                                                     |
|                                            |        | Uterine prolapse without mention of vaginal wall prolapse           |
|                                            | 618.1  |                                                                     |
|                                            | 618.2  | Uterovaginal prolapse, incomplete                                   |
|                                            | 618.3  | Uterovaginal prolapse, complete                                     |
|                                            | 618.4  | Uterovaginal prolapse, unspecified                                  |
|                                            | 618.5  | Prolapse of vaginal vault after hysterectomy                        |
|                                            | 618.6  | Vaginal enterocele, congenital or acquired                          |
|                                            | 618.7  | Old laceration of muscles of pelvic floor                           |
|                                            | 618.8  | Other specified genital prolapse                                    |
|                                            | 618.81 | Incompetence or weakening of pubocervical tissue                    |
|                                            | 618.82 | Incompetence or weakening of rectovaginal tissue                    |
|                                            | 618.83 | Pelvic muscle wasting                                               |
|                                            | 618.84 | Cervical stump prolapse                                             |
|                                            | 618.89 | Other specified genital prolapse                                    |
|                                            | 618.9  | Unspecified genital prolapse                                        |
| <b>Benign neoplasm of the uterus/ovary</b> | 220    | Benign neoplasm of ovary                                            |
|                                            | 219    | Other benign neoplasm of uterus                                     |

|                                |                             |                                                                                     |
|--------------------------------|-----------------------------|-------------------------------------------------------------------------------------|
|                                | 219.0                       | Benign neoplasm of cervix uteri                                                     |
|                                | 219.1                       | Benign neoplasm of corpus uteri                                                     |
|                                | 219.8                       | Benign neoplasm of other specified parts of uterus                                  |
|                                | 219.9                       | Benign neoplasm of uterus, part unspecified                                         |
| <b>Sepsis</b>                  | 038.0x-                     |                                                                                     |
|                                | 038.9x                      | Septicemia                                                                          |
|                                | 038.0                       | Streptococcal septicemia                                                            |
|                                | 038.1                       | Staphylococcal septicemia                                                           |
|                                | 038.10                      | Staphylococcal septicemia, unspecified                                              |
|                                | 038.11                      | Methicillin susceptible <i>Staphylococcus aureus</i> septicemia                     |
|                                | 038.12                      | Methicillin resistant <i>Staphylococcus aureus</i> septicemia                       |
|                                | 038.19                      | Other staphylococcal septicemia                                                     |
|                                | 038.2                       | Pneumococcal septicemia [ <i>Streptococcus pneumoniae</i> septicemia]               |
|                                | 038.3                       | Septicemia due to anaerobes                                                         |
|                                | 038.4                       | Septicemia due to other gram-negative organisms                                     |
|                                | 038.40                      | Septicemia due to gram-negative organism, unspecified                               |
|                                | 038.41                      | Septicemia due to hemophilus influenzae [H. influenzae]                             |
|                                | 038.42                      | Septicemia due to escherichia coli [E. coli]                                        |
|                                | 038.43                      | Septicemia due to pseudomonas                                                       |
|                                | 038.44                      | Septicemia due to serratia                                                          |
|                                | 038.49                      | Other septicemia due to gram-negative organisms                                     |
| 038.8                          | Other specified septicemias |                                                                                     |
| 038.9                          | Unspecified septicemia      |                                                                                     |
| 670.2                          | Puerperal sepsis            |                                                                                     |
| 995.91                         | Sepsis                      |                                                                                     |
| 995.92                         | Severe sepsis               |                                                                                     |
| <b>Intestinal obstructions</b> | 537.3                       | Other obstruction of duodenum                                                       |
|                                | 560.89                      | Other specified intestinal obstruction                                              |
|                                | 560                         | Intestinal obstruction without mention of hernia                                    |
|                                | 560.0                       | Intussusception                                                                     |
|                                | 560.8                       | Other specified intestinal obstruction                                              |
|                                | 560.81                      | Intestinal or peritoneal adhesions with obstruction (postoperative) (postinfection) |
|                                | 560.9                       | Unspecified intestinal obstruction                                                  |
| <b>Peritonitis</b>             | 567.xx                      | Peritonitis and retroperitoneal infections                                          |
|                                | 567.0                       | Peritonitis in infectious diseases classified elsewhere                             |
|                                | 567.1                       | Pneumococcal peritonitis                                                            |
|                                | 567.2                       | Other suppurative peritonitis                                                       |

|                             |        |                                                                                      |
|-----------------------------|--------|--------------------------------------------------------------------------------------|
|                             | 567.21 | Peritonitis (acute) generalized                                                      |
|                             | 567.22 | Peritoneal abscess                                                                   |
|                             | 567.23 | Spontaneous bacterial peritonitis                                                    |
|                             | 567.29 | Other suppurative peritonitis                                                        |
|                             | 567.3  | Retroperitoneal infections                                                           |
|                             | 567.31 | Psoas muscle abscess                                                                 |
|                             | 567.38 | Other retroperitoneal abscess                                                        |
|                             | 567.39 | Other retroperitoneal infections                                                     |
|                             | 567.8  | Other specified peritonitis                                                          |
|                             | 567.81 | Choleperitonitis                                                                     |
|                             | 567.82 | Sclerosing mesenteritis                                                              |
|                             | 567.89 | Other specified peritonitis                                                          |
|                             | 567.9  | Unspecified peritonitis                                                              |
|                             | 098.86 | Gonococcal peritonitis                                                               |
|                             | 614.5  | Acute or unspecified pelvic peritonitis, female                                      |
|                             | 614.7  | Other chronic pelvic peritonitis, female                                             |
| <b>Nocturia</b>             | 788.43 | Nocturia                                                                             |
| <b>Dyspareunia</b>          | 625.0  | Dyspareunia                                                                          |
| <b>Spontaneous abortion</b> | 634.X  | Spontaneous abortion                                                                 |
|                             | 634.0  | Spontaneous abortion; complicated by genital tract and pelvic infection              |
|                             | 634.00 | Spontaneous abortion, complicated by genital tract and pelvic infection, unspecified |
|                             | 634.01 | Spontaneous abortion, complicated by genital tract and pelvic infection, incomplete  |
|                             | 634.02 | Spontaneous abortion, complicated by genital tract and pelvic infection, complete    |
|                             | 634.1  | Spontaneous abortion; complicated by delayed or excessive hemorrhage                 |
|                             | 634.10 | Spontaneous abortion, complicated by delayed or excessive hemorrhage, unspecified    |
|                             | 634.11 | Spontaneous abortion, complicated by delayed or excessive hemorrhage, incomplete     |
|                             | 634.12 | Spontaneous abortion, complicated by delayed or excessive hemorrhage, complete       |
|                             | 634.2  | Spontaneous abortion; complicated by damage to pelvic organs or tissues              |
|                             | 634.20 | Spontaneous abortion, complicated by damage to pelvic organs or tissues, unspecified |
|                             | 634.21 | Spontaneous abortion, complicated by damage to pelvic organs or tissues, incomplete  |
|                             | 634.22 | Spontaneous abortion, complicated by damage to pelvic organs or tissues, complete    |

634.3 Spontaneous abortion; complicated by renal failure  
Spontaneous abortion, complicated by renal failure,  
634.30 unspecified  
Spontaneous abortion, complicated by renal failure,  
634.31 incomplete  
Spontaneous abortion, complicated by renal failure,  
634.32 complete  
Spontaneous abortion; complicated by metabolic  
634.4 disorder  
Spontaneous abortion, complicated by metabolic  
634.40 disorder, unspecified  
Spontaneous abortion, complicated by metabolic  
634.41 disorder, incomplete  
Spontaneous abortion, complicated by metabolic  
634.42 disorder, complete  
634.5 Spontaneous abortion; complicated by shock  
Spontaneous abortion, complicated by shock,  
634.50 unspecified  
Spontaneous abortion, complicated by shock,  
634.51 incomplete  
  
634.52 Spontaneous abortion, complicated by shock, complete  
634.6 Spontaneous abortion; complicated by embolism  
Spontaneous abortion, complicated by embolism,  
634.60 unspecified  
Spontaneous abortion, complicated by embolism,  
634.61 incomplete  
Spontaneous abortion, complicated by embolism,  
634.62 complete  
Spontaneous abortion; with other specified  
634.7 complications  
Spontaneous abortion, with other specified  
634.70 complications, unspecified  
Spontaneous abortion, with other specified  
634.71 complications, incomplete  
Spontaneous abortion, with other specified  
634.72 complications, complete  
634.8 Spontaneous abortion; with unspecified complication  
Spontaneous abortion, with unspecified complication,  
634.80 unspecified  
Spontaneous abortion, with unspecified complication,  
634.81 incomplete



**Therapeutic abortion**

- 634.82 Spontaneous abortion, with unspecified complication, complete
- 634.9 Spontaneous abortion; without mention of complication
- 634.90 Spontaneous abortion, without mention of complication, unspecified
- 634.91 Spontaneous abortion, without mention of complication, incomplete
- 634.92 Spontaneous abortion, without mention of complication, complete
- 635.X Legally induced abortion
- 635.0 Legally induced abortion; complicated by genital tract and pelvic infection
- 635.00 Legally induced abortion, complicated by genital tract and pelvic infection, unspecified
- 635.01 Legally induced abortion, complicated by genital tract and pelvic infection, incomplete
- 635.02 Legally induced abortion, complicated by genital tract and pelvic infection, complete
- 635.1 Legally induced abortion; complicated by delayed or excessive hemorrhage
- 635.10 Legally induced abortion, complicated by delayed or excessive hemorrhage, unspecified
- 635.11 Legally induced abortion, complicated by delayed or excessive hemorrhage, incomplete
- 635.12 Legally induced abortion, complicated by delayed or excessive hemorrhage, complete
- 635.2 Legally induced abortion; complicated by damage to pelvic organs or tissues
- 635.20 Legally induced abortion, complicated by damage to pelvic organs or tissues, unspecified
- 635.21 Legally induced abortion, complicated by damage to pelvic organs or tissues, incomplete
- 635.22 Legally induced abortion, complicated by damage to pelvic organs or tissues, complete
- 635.3 Legally induced abortion; complicated by renal failure
- 635.30 Legally induced abortion, complicated by renal failure, unspecified
- 635.31 Legally induced abortion, complicated by renal failure, incomplete
- 635.32 Legally induced abortion, complicated by renal failure, complete

|        |                                                                           |
|--------|---------------------------------------------------------------------------|
| 635.4  | Legally induced abortion; complicated by metabolic disorder               |
| 635.40 | Legally induced abortion, complicated by metabolic disorder, unspecified  |
| 635.41 | Legally induced abortion, complicated by metabolic disorder, incomplete   |
| 635.42 | Legally induced abortion, complicated by metabolic disorder, complete     |
| 635.5  | Legally induced abortion; complicated by shock                            |
| 635.50 | Legally induced abortion, complicated by shock, unspecified               |
| 635.51 | Legally induced abortion, complicated by shock, incomplete                |
| 635.52 | Legally induced abortion, complicated by shock, complete                  |
| 635.6  | Legally induced abortion; complicated by embolism                         |
| 635.60 | Legally induced abortion, complicated by embolism, unspecified            |
| 635.61 | Legally induced abortion, complicated by embolism, incomplete             |
| 635.62 | Legally induced abortion, complicated by embolism, complete               |
| 635.7  | Legally induced abortion; with other specified complications              |
| 635.70 | Legally induced abortion, with other specified complications, unspecified |
| 635.71 | Legally induced abortion, with other specified complications, incomplete  |
| 635.72 | Legally induced abortion, with other specified complications, complete    |
| 635.8  | Legally induced abortion; with unspecified complication                   |
| 635.80 | Legally induced abortion, with unspecified complication, unspecified      |
| 635.81 | Legally induced abortion, with unspecified complication, incomplete       |
| 635.82 | Legally induced abortion, with unspecified complication, complete         |
| 635.9  | Legally induced abortion; without mention of complication                 |
| 635.90 | Legally induced abortion, without mention of complication, unspecified    |

|                          |        |                                                                                                 |
|--------------------------|--------|-------------------------------------------------------------------------------------------------|
|                          | 635.91 | Legally induced abortion, without mention of complication, incomplete                           |
|                          | 635.92 | Legally induced abortion, without mention of complication, complete                             |
| <b>Ectopic pregnancy</b> | 633    | Ectopic pregnancy                                                                               |
|                          | 633.0  | Abdominal pregnancy                                                                             |
|                          | 633.00 | Abdominal pregnancy without intrauterine pregnancy                                              |
|                          | 633.01 | Abdominal pregnancy with intrauterine pregnancy                                                 |
|                          | 633.1  | Tubal pregnancy                                                                                 |
|                          | 633.10 | Tubal pregnancy without intrauterine pregnancy                                                  |
|                          | 633.11 | Tubal pregnancy with intrauterine pregnancy                                                     |
|                          | 633.2  | Ovarian pregnancy                                                                               |
|                          | 633.20 | Ovarian pregnancy without intrauterine pregnancy                                                |
|                          | 633.21 | Ovarian pregnancy with intrauterine pregnancy                                                   |
|                          | 633.8  | Other ectopic pregnancy                                                                         |
|                          | 633.80 | Other ectopic pregnancy without intrauterine pregnancy                                          |
|                          | 633.81 | Other ectopic pregnancy with intrauterine pregnancy                                             |
|                          | 633.9  | Unspecified ectopic pregnancy                                                                   |
|                          | 633.90 | Unspecified ectopic pregnancy without intrauterine pregnancy                                    |
|                          | 633.91 | Unspecified ectopic pregnancy with intrauterine pregnancy                                       |
| <b>Cesarean section</b>  | 669.7  | Cesarean delivery, without mention of indication                                                |
|                          | 654.1  | Tumors of body of uterus                                                                        |
|                          | 654.10 | Tumors of body of uterus, unspecified as to episode of care or not applicable                   |
|                          | 654.11 | Tumors of body of uterus, delivered, with or without mention of antepartum condition            |
|                          | 654.12 | Tumors of body of uterus, delivered, with mention of postpartum complication                    |
|                          | 654.13 | Tumors of body of uterus, antepartum condition or complication                                  |
|                          | 654.14 | Tumors of body of uterus, postpartum condition or complication                                  |
|                          | 654.3  | Retroverted and incarcerated gravid uterus                                                      |
|                          | 654.30 | Retroverted and incarcerated gravid uterus, unspecified as to episode of care or not applicable |
|                          | 654.31 | Retroverted and incarcerated gravid uterus, delivered, with mention of antepartum condition     |
|                          | 654.32 | Retroverted and incarcerated gravid uterus, delivered, with mention of postpartum complication  |

|                                |        |                                                                                                                                    |
|--------------------------------|--------|------------------------------------------------------------------------------------------------------------------------------------|
|                                | 654.33 | Retroverted and incarcerated gravid uterus, antepartum condition or complication                                                   |
|                                | 654.34 | Retroverted and incarcerated gravid uterus, postpartum condition or complication                                                   |
|                                | 654.81 | Congenital or acquired abnormality of vulva, delivered, with or without mention of antepartum condition                            |
|                                | 654.82 | Congenital or acquired abnormality of vulva, delivered, with mention of postpartum complication                                    |
|                                | 654.83 | Congenital or acquired abnormality of vulva, antepartum condition or complication                                                  |
|                                | 654.84 | Congenital or acquired abnormality of vulva, postpartum condition or complication                                                  |
|                                | 654.9  | Abnormality of organs and soft tissues of pelvis; other and unspecified                                                            |
|                                | 654.90 | Other and unspecified abnormality of organs and soft tissues of pelvis, unspecified as to episode of care or not applicable        |
|                                | 654.91 | Other and unspecified abnormality of organs and soft tissues of pelvis, delivered, with or without mention of antepartum condition |
|                                | 654.92 | Other and unspecified abnormality of organs and soft tissues of pelvis, delivered, with mention of postpartum complication         |
|                                | 654.93 | Other and unspecified abnormality of organs and soft tissues of pelvis, antepartum condition or complication                       |
|                                | 654.94 | Other and unspecified abnormality of organs and soft tissues of pelvis, postpartum condition or complication                       |
| <b>Uterine Cancer</b>          | 179    | Malignant neoplasm of uterus, part unspecified                                                                                     |
|                                | 182    | Malignant neoplasm of body of uterus                                                                                               |
|                                | 182.0  | Malignant neoplasm of corpus uteri, except isthmus                                                                                 |
|                                | 182.1  | Malignant neoplasm of isthmus                                                                                                      |
|                                | 182.8  | Malignant neoplasm of other specified sites of body of uterus                                                                      |
| <b>Other pelvic malignancy</b> | 183    | Malignant neoplasm of ovary and other uterine adnexa                                                                               |
|                                | 183.0  | Malignant neoplasm of ovary                                                                                                        |
|                                | 183.2  | Malignant neoplasm of fallopian tube                                                                                               |
|                                | 183.3  | Malignant neoplasm of broad ligament of uterus                                                                                     |
|                                | 183.4  | Malignant neoplasm of parametrium                                                                                                  |
|                                | 183.5  | Malignant neoplasm of round ligament of uterus                                                                                     |

183.8 Malignant neoplasm of other specified sites of uterine adnexa

183.9 Malignant neoplasm of uterine adnexa, unspecified site

---
