# Supplementary material
Source: PubMed Central journal article supplement (PMC5736004)
Supplement: NIHMS924330-supplement-Supp_FigS10.pdf [file NIHMS924330-supplement-Supp_FigS10.pdf]

**Table S7.** International Classification of Disease, 9th edition, Clinical Modification (ICD-9-CM) Procedure Codes Used to Define Uterine Fibroid Procedural Treatment

|                                    | CPT code                   | ICD9 Procedure Code | Description                                                                                                                                                                                            |
|------------------------------------|----------------------------|---------------------|--------------------------------------------------------------------------------------------------------------------------------------------------------------------------------------------------------|
| <b>Endometrial ablation</b>        | 56356, replace by<br>58563 |                     | Hysteroscopy, surgical; with endometrial ablation (eg, endometrial resection, electrosurgical ablation, thermoablation)                                                                                |
|                                    | 58353                      |                     | Endometrial ablation, thermal, without hysteroscopic guidance                                                                                                                                          |
|                                    | 58561                      |                     | Hysteroscopy, surgical; with removal of leiomyomata                                                                                                                                                    |
|                                    |                            | 68.21<br>68.23      | Division of endometrial synechiae<br>Endometrial ablation                                                                                                                                              |
| <b>Focused ultrasound ablation</b> | 0071T                      |                     | Focused ultrasound ablation of uterine leiomyomata, including MR guidance; total leiomyomata volume less than 200 cc of tissue                                                                         |
|                                    | 0072T                      |                     | Focused ultrasound ablation of uterine leiomyomata, including MR guidance; total leiomyomata volume greater or equal to 200 cc of tissue                                                               |
|                                    | C9734                      |                     | Focused ultrasound ablation/therapeutic intervention, other than uterine leiomyomata, with magnetic resonance (MR) guidance                                                                            |
| <b>Uterine artery embolization</b> | 36247                      |                     | Selective catheter placement, arterial system; initial third order or more selective abdominal, pelvic, or lower extremity artery branch, within a vascular family                                     |
|                                    | 37204                      |                     | Transcatheter occlusion or embolization (eg, for tumor destruction, to achieve hemostasis, to occlude a vascular malformation), percutaneous, any method, non-central nervous system, non-head or neck |
|                                    | S2250                      |                     | Uterine artery embolization for uterine fibroids                                                                                                                                                       |

|                                     |       |       |                                                                                                                                                                                                                                                                                                                                                 |
|-------------------------------------|-------|-------|-------------------------------------------------------------------------------------------------------------------------------------------------------------------------------------------------------------------------------------------------------------------------------------------------------------------------------------------------|
|                                     |       |       | Uterine fibroid embolization (UFE, embolization of the uterine arteries to treat uterine fibroids, leiomyomata), percutaneous approach inclusive of vascular access, vessel selection, embolization, and all radiological supervision and interpretation, intraprocedural roadmapping, and imaging guidance necessary to complete the procedure |
|                                     | 37210 |       |                                                                                                                                                                                                                                                                                                                                                 |
|                                     |       | 68.24 | Uterine artery embolization [UAE] with coils                                                                                                                                                                                                                                                                                                    |
|                                     |       | 68.25 | Uterine artery embolization [UAE] without coils                                                                                                                                                                                                                                                                                                 |
| <b>Hysterectomy</b>                 |       |       |                                                                                                                                                                                                                                                                                                                                                 |
|                                     |       |       | Total abdominal hysterectomy (corpus and cervix), with or without removal of tube(s), with or without removal of ovary(s)                                                                                                                                                                                                                       |
| <b>Total abdominal hysterectomy</b> | 58150 |       | Total abdominal hysterectomy (corpus and cervix), with or without removal of tube(s), with or without removal of ovary(s); with colpo-urethrocystopexy (eg, Marshall-Marchetti-Krantz, Burch)                                                                                                                                                   |
|                                     | 58152 |       | Total abdominal hysterectomy, including partial vaginectomy, with para-aortic and pelvic lymph node sampling, with or without removal of tube(s), with or without removal of ovary(s)                                                                                                                                                           |
|                                     | 58200 |       | Bilateral salpingo-oophorectomy with omentectomy, total abdominal hysterectomy and radical dissection for debulking                                                                                                                                                                                                                             |
|                                     | 58953 |       | Bilateral salpingo-oophorectomy with omentectomy, total abdominal hysterectomy and radical dissection for debulking; with pelvic lymphadenectomy and limited para-aortic lymphadenectomy                                                                                                                                                        |
|                                     | 58954 |       | Bilateral salpingo-oophorectomy with total omentectomy, total abdominal hysterectomy for malignancy                                                                                                                                                                                                                                             |
|                                     | 58956 | 68.4  | Total abdominal hysterectomy                                                                                                                                                                                                                                                                                                                    |
|                                     |       | 68.49 | Other and unspecified total abdominal hysterectomy                                                                                                                                                                                                                                                                                              |

|                             |       |                                                                                                                                                                    |                                                                                                                                                               |
|-----------------------------|-------|--------------------------------------------------------------------------------------------------------------------------------------------------------------------|---------------------------------------------------------------------------------------------------------------------------------------------------------------|
| <b>Vaginal hysterectomy</b> | 58260 |                                                                                                                                                                    | Vaginal hysterectomy, for uterus 250 g or less;                                                                                                               |
|                             |       |                                                                                                                                                                    | Vaginal hysterectomy, for uterus 250 g or less; with removal of tube(s), and/or ovary(s)                                                                      |
|                             | 58262 |                                                                                                                                                                    |                                                                                                                                                               |
|                             |       |                                                                                                                                                                    | Vaginal hysterectomy, for uterus 250 g or less; with removal of tube(s), and/or ovary(s), with repair of enterocele                                           |
|                             | 58263 |                                                                                                                                                                    |                                                                                                                                                               |
|                             |       |                                                                                                                                                                    | Vaginal hysterectomy, for uterus 250 g or less; with colpo-urethrocystopexy (Marshall-Marchetti-Krantz type, Pereyra type) with or without endoscopic control |
|                             | 58267 |                                                                                                                                                                    |                                                                                                                                                               |
|                             |       |                                                                                                                                                                    | Vaginal hysterectomy, for uterus 250 g or less; with repair of enterocele                                                                                     |
|                             | 58270 |                                                                                                                                                                    |                                                                                                                                                               |
|                             |       |                                                                                                                                                                    | Vaginal hysterectomy, with total or partial vaginectomy;                                                                                                      |
|                             | 58275 |                                                                                                                                                                    |                                                                                                                                                               |
|                             |       |                                                                                                                                                                    | Vaginal hysterectomy, with total or partial vaginectomy; with repair of enterocele                                                                            |
|                             | 58280 |                                                                                                                                                                    |                                                                                                                                                               |
|                             |       |                                                                                                                                                                    | Vaginal hysterectomy, radical (Schauta type operation)                                                                                                        |
| 58285                       |       |                                                                                                                                                                    |                                                                                                                                                               |
|                             |       | Vaginal hysterectomy, for uterus greater than 250 g;                                                                                                               |                                                                                                                                                               |
| 58290                       |       |                                                                                                                                                                    |                                                                                                                                                               |
|                             |       | Vaginal hysterectomy, for uterus greater than 250 g; with removal of tube(s) and/or ovary(s)                                                                       |                                                                                                                                                               |
| 58291                       |       |                                                                                                                                                                    |                                                                                                                                                               |
|                             |       | Vaginal hysterectomy, for uterus greater than 250 g; with removal of tube(s) and/or ovary(s), with repair of enterocele                                            |                                                                                                                                                               |
| 58292                       |       |                                                                                                                                                                    |                                                                                                                                                               |
|                             |       | Vaginal hysterectomy, for uterus greater than 250 g; with colpo-urethrocystopexy (Marshall-Marchetti-Krantz type, Pereyra type) with or without endoscopic control |                                                                                                                                                               |
| 58293                       |       |                                                                                                                                                                    |                                                                                                                                                               |
|                             |       | Vaginal hysterectomy, for uterus greater than 250 g; with repair of enterocele                                                                                     |                                                                                                                                                               |
| 58294                       |       |                                                                                                                                                                    |                                                                                                                                                               |
|                             |       | 68.5                                                                                                                                                               | Vaginal hysterectomy                                                                                                                                          |
|                             |       | 68.59                                                                                                                                                              | Other and unspecified vaginal hysterectomy                                                                                                                    |
| <b>Laparoscopic/robotic</b> | 58541 |                                                                                                                                                                    | Laparoscopy, surgical, supracervical hysterectomy, for uterus 250 g or less;                                                                                  |
|                             | 58542 |                                                                                                                                                                    | Laparoscopy, surgical, supracervical hysterectomy, for uterus 250 g or less; with removal of tube(s) and/or ovary(s)                                          |

|                              |       |                                                                                                                                          |
|------------------------------|-------|------------------------------------------------------------------------------------------------------------------------------------------|
|                              |       | Laparoscopy, surgical, supracervical hysterectomy, for uterus greater than 250 g;                                                        |
| 58543                        |       | Laparoscopy, surgical, supracervical hysterectomy, for uterus greater than 250 g;                                                        |
|                              |       | Laparoscopy, surgical, supracervical hysterectomy, for uterus greater than 250 g; with removal of tube(s) and/or ovary(s)                |
| 58544                        |       | Laparoscopy, surgical, with vaginal hysterectomy, for uterus 250 g or less;                                                              |
| 58550                        |       | Laparoscopy, surgical, with vaginal hysterectomy, for uterus 250 g or less; with removal of tube(s) and/or ovary(s)                      |
| 58552                        |       | Laparoscopy, surgical, with vaginal hysterectomy, for uterus greater than 250 g;                                                         |
| 58553                        |       | Laparoscopy, surgical, with vaginal hysterectomy, for uterus greater than 250 g; with removal of tube(s) and/or ovary(s)                 |
| 58554                        |       | Laparoscopy, surgical, with total hysterectomy, for uterus 250 g or less;                                                                |
| 58570                        |       | Laparoscopy, surgical, with total hysterectomy, for uterus 250 g or less; with removal of tube(s) and/or ovary(s)                        |
| 58571                        |       | Laparoscopy, surgical, with total hysterectomy, for uterus greater than 250 g;                                                           |
| 58572                        |       | Laparoscopy, surgical, with total hysterectomy, for uterus greater than 250 g; with removal of tube(s) and/or ovary(s)                   |
| 58573                        |       | Unlisted laparoscopy procedure, uterus                                                                                                   |
| 58578                        |       | Laparoscopic supracervical hysterectomy (subtotal hysterectomy), with or without removal of tube(s), with or without removal of ovary(s) |
| S2078                        |       | Laparoscopic total abdominal hysterectomy                                                                                                |
|                              | 68.41 | Laparoscopically assisted vaginal hysterectomy (LAVH)                                                                                    |
|                              | 68.51 | Laparoscopic supracervical hysterectomy [LSH]                                                                                            |
|                              | 68.31 |                                                                                                                                          |
| <b>Subtotal hysterectomy</b> | 58180 | Supracervical abdominal hysterectomy (subtotal hysterectomy), with or without                                                            |

|                             |       |       |                                                                                                                                                                                                   |
|-----------------------------|-------|-------|---------------------------------------------------------------------------------------------------------------------------------------------------------------------------------------------------|
|                             |       |       | removal of tube(s), with or without removal of ovary(s)                                                                                                                                           |
|                             |       | 68.3  | Subtotal abdominal hysterectomy                                                                                                                                                                   |
|                             |       | 68.39 | Other and unspecified subtotal abdominal hysterectomy                                                                                                                                             |
| <b>Radical hysterectomy</b> | 58210 |       | Radical abdominal hysterectomy, with bilateral total pelvic lymphadenectomy and para-aortic lymph node sampling (biopsy), with or without removal of tube(s), with or without removal of ovary(s) |
|                             | 58548 |       | Laparoscopy, surgical, with radical hysterectomy, with bilateral total pelvic lymphadenectomy and para-aortic lymph node sampling (biopsy), with removal of tube(s) and ovary(s), if performed    |
|                             |       | 68.6  | Radical abdominal hysterectomy                                                                                                                                                                    |
|                             |       | 68.61 | Laparoscopic radical abdominal hysterectomy                                                                                                                                                       |
|                             |       | 68.69 | Other and unspecified radical abdominal hysterectomy                                                                                                                                              |
|                             |       | 68.7  | Radical vaginal hysterectomy                                                                                                                                                                      |
|                             |       | 68.71 | Laparoscopic radical vaginal hysterectomy [LRVH]                                                                                                                                                  |
|                             |       | 68.79 | Other and unspecified radical vaginal hysterectomy                                                                                                                                                |
|                             |       | 68.9  | Other and unspecified hysterectomy                                                                                                                                                                |
| <b>Myomectomy</b>           |       |       |                                                                                                                                                                                                   |
| <b>Abdominal myomectomy</b> | 58140 |       | Myomectomy, excision of fibroid tumor(s) of uterus, 1 to 4 intramural myoma(s) with total weight of 250 g or less and/or removal of surface myomas; abdominal approach                            |
|                             | 58146 |       | Myomectomy, excision of fibroid tumor(s) of uterus, 5 or more intramural myomas and/or intramural myomas with total weight greater than 250 g, abdominal approach                                 |
| <b>Vaginal myomectomy</b>   | 58145 |       | Myomectomy, excision of fibroid tumor(s) of uterus, 1 to 4 intramural myoma(s) with total weight of 250 g or less and/or removal of surface myomas; vaginal approach                              |

**Laparoscopy  
myomectomy**

58545

Laparoscopy, surgical, myomectomy,  
excision; 1 to 4 intramural myomas with  
total weight of 250 g or less and/or  
removal of surface myomas

58546

Laparoscopy, surgical, myomectomy,  
excision; 5 or more intramural myomas  
and/or intramural myomas with total  
weight greater than 250 g

58551

This description expired on 2003,  
replaced by 58545 and 58546  
Other excision or destruction of lesion of  
uterus

68.29

---
