# Supplementary material
Source: PubMed Central journal article supplement (PMC5736004)

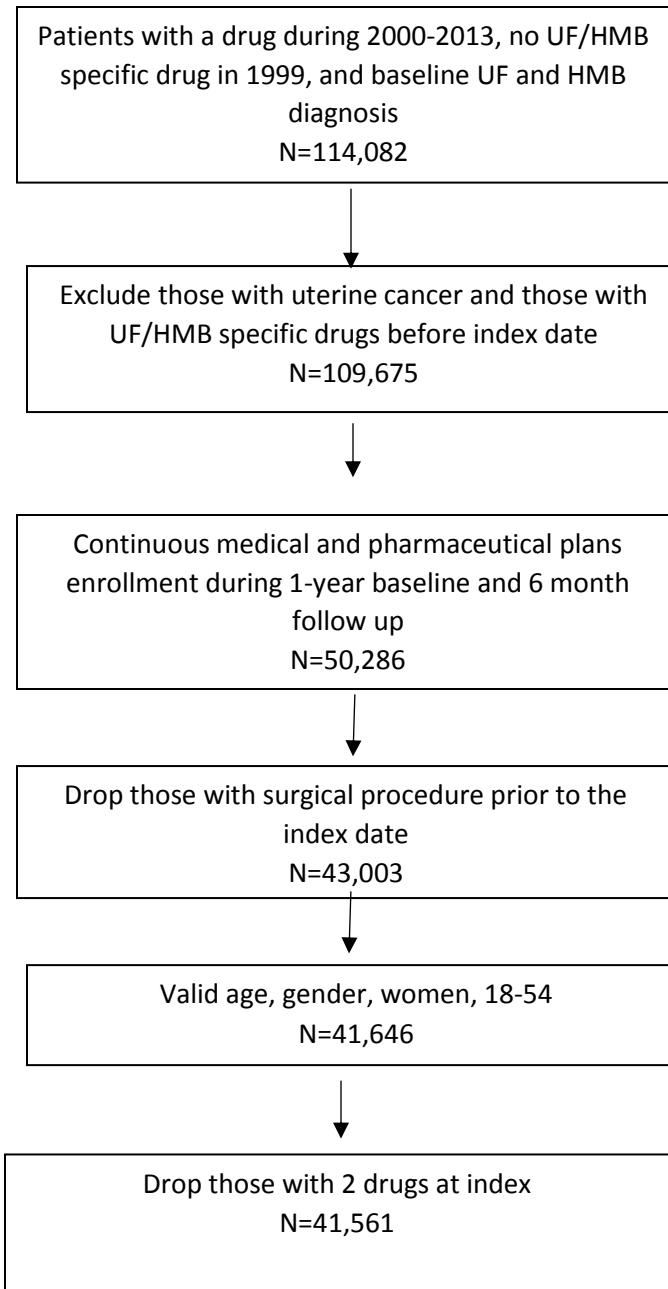

**Figure S2.** Flowchart documenting patient selection criteria

Supplement: NIHMS924330-supplement-Supp_FigS2.pdf [file NIHMS924330-supplement-Supp_FigS2.pdf]
